# Supplementary material
Source: PubMed Central journal article supplement (PMC5469430)
Supplement: NIHMS70345-supplement-Supplemental_Movie_1_Legend.pdf [file NIHMS70345-supplement-Supplemental_Movie_1_Legend.pdf]

**Supplemental Movie 1.** *Real-time imaging of intraluminal migration of CX<sub>3</sub>CR1<sup>+</sup> cells.* *InvA<sup>-</sup>AroA<sup>-</sup>Salmonella* were introduced into intestinal isolated loops and migration of fluorescent CX<sub>3</sub>CR1<sup>+gfp</sup> cells was monitored (XY plan) by two-photon microscope. Two hours after the application of the bacterial challenge, CX<sub>3</sub>CR1<sup>+gfp</sup> cell (red circle) protruded into the intestinal lumen from the surface of the intestinal epithelium, and after migrating completely into the lumen subsequently moved away following a non-linear trajectory (red line) from the site of entry. The movie also shows that the imaged cell was immediately followed by another CX<sub>3</sub>CR1<sup>+gfp</sup> cell protruding via the same opening in the epithelium. Lapse time is shown on the upper left corner of video; Scale bar =10μm.
